# Supplementary material for: Impact of an educational program on earthquake awareness and preparedness in Nepal
Source: Copernicus journal article supplement (doi:10.5194/gc-2020-25), 2020-04-20
Supplement: Supplementary file 1 [file gc-2020-25-supplement.pdf]

Supplementary Table 1: Summary of questions asked in the 2018 and 2020 surveys, followed by statistical indices of change in 2 years of our program: the corresponding calculated and tabulated chi-square values, and p-values at 0.05 significance level.

| Q.N. | Questions                                                                                                                                                                                                      | Observed $\chi^2$ Value | Threshold $\chi^2$ Value | p-value  | Remarks                  |
|------|----------------------------------------------------------------------------------------------------------------------------------------------------------------------------------------------------------------|-------------------------|--------------------------|----------|--------------------------|
| Q1   | In your opinion, what should be the cause of an earthquake?                                                                                                                                                    | 78.15                   | 7.81                     | <0.00001 | Null hypothesis rejected |
| Q3   | What do you think, how likely is the occurrence of an earthquake in Nepal greater than the magnitude of 2015 Gorkha earthquake in your life?                                                                   | 43.59                   | 9.49                     | <0.00001 |                          |
| Q4   | What do you think, can your house building resist a large earthquake?                                                                                                                                          | 10.30                   | 5.99                     | 0.005    |                          |
| Q5   | Do all the members of your family know exactly what to do and where to go at the time of an earthquake?                                                                                                        | 32.96                   | 5.99                     | <0.00001 |                          |
| Q6   | Do you know you should not call others after an event, to leave the lines available for rescue operations?                                                                                                     | 138.72                  | 3.84                     | <0.00001 |                          |
| Q7   | If a large earthquake occurred at night, could you save yourself?                                                                                                                                              | 37.65                   | 3.84                     | <0.00001 |                          |
| Q8   | Do you know that the majority of all injuries that occur in earthquakes are caused by people being hit by or stumbling over fallen objects such as furniture, glassware, appliances and pictures on the walls? | 44.16                   | 3.84                     | <0.00001 |                          |
| Q9   | Do you know that earthquakes can make additional damage such as fire, landslides, floods?                                                                                                                      | 7.33                    | 5.99                     | 0.025    |                          |
| Q10  | What do you think the level of risk for an earthquake is in your city?                                                                                                                                         | 6.33                    | 5.99                     | 0.042    |                          |
| Q11  | The preparedness for a major earthquake is the most important thing. Are you regularly discussing this topic with your family?                                                                                 | 27.70                   | 3.84                     | <0.00001 |                          |
| Q12  | Are you interested to know more about earthquakes and preparedness in details?                                                                                                                                 | 0.016                   | 3.84                     | 0.899    |                          |
