# Supplementary material for: Impact of an educational program on earthquake awareness and preparedness in Nepal
Source: Copernicus journal article supplement (doi:10.5194/gc-2020-25), 2020-04-20
Supplement: Supplementary file [file gc-2020-25-AC2-supplement.pdf]

## Referee 2

### General comments

This is a clearly written paper with well justified conclusions based on pre/post surveying of student attitudes, knowledge and behaviors related to earthquake awareness and preparedness. It is impressive to see such a significant effect on student knowledge and their sharing of that increased knowledge with the community after just 2 years. The educational program is very well designed, with a 3-pronged approach of new lessons and lectures taught by the authors, teacher professional development, and the installation of a school seismograph network, all done in collaboration with school leaders. The discussion of the difficulty of changing the perception of risk, even with the documented increase in earthquake hazard knowledge raised a number of interesting points.

Thank you very much.

### Specific comments

This may be outside the scope of the paper, but I'd be interested to know whether the authors have any data, or can speculate as to the relative importance of the 3 components of the program? Particularly, is it possible to show that having a school seismograph increased student engagement beyond what would have occurred with only lessons and lectures taught by the authors and teacher professional development? If such a claim can be made, it would be helpful for the seismographs in schools' community.

Thank you so much, this is a very good idea. We agree that it would be nice to see the impact of the seismometer and special lectures independently and the result could help to develop such educational program in large scale. Unfortunately, there are no schools where a seismometer is not installed and all schools also had special lectures and therefore we do not have a control to test against. We keep this idea in the list of perspectives for the future development of the program.

Line 143: A little more information would be helpful about the question relating to students knowing when an earthquake will occur, as I didn't quite understand what was being asked. Could you include the full question in the figure 7 caption? That question doesn't seem to be in the supplement.

This was a generic question, the title and answer options for this question were as shown on Figure 7, with multiple choice answers. Also, we have now included the complete questionnaire in the supplement, the corresponding question is Q13. We also add each question number at the corresponding figure.

Figure 8: I suggest modifying the caption to more closely reflect the question, e.g. Need to avoid making phone calls after earthquake.

The figure caption was modified with the suggested text.

### Technical/typographic corrections

Line 58: missing comma between awareness and preparations.

Thanks, we have inserted the comma.

Line 99: extra "the" : "and the all the"

We have removed the extra 'the' and the sentence now reads "and all the ..."

Line 166: I think this should be “hit by objects, not collapse of constructions”

We kept the sentence “hit by objects, collapse of constructions” as most of casualties/injuries are by both of these reasons in developing countries like Nepal, where construction quality is not good enough to resist big earthquakes.

Line 240: I think this should be “level was increased”

We modified the beginning of the sentence and now “have” makes sense.

Line 312: I think this should be “implemented and achieved”

We have added “and” in the sentence.

Line 327: I think this should be “allowed us to invite”

We have changed the sentence accordingly.

Table 1, Q11: I think this should be “preparedness for a major”

We have changed the sentence accordingly.
